# Supplementary material for: Analysis of polar primary metabolites in biological samples using targeted metabolomics and LC-MS
Source: PubMed Central journal article supplement — STAR Protoc. 2023 Aug 16;4(3):102400. doi: 10.1016/j.xpro.2023.102400 (PMC10440349; doi:10.1016/j.xpro.2023.102400), 2023-08-16

**Table S2: List of chemicals for preparing the QC, related to “Preparing control samples” section.**

| No. | Name                                 | KEGG Number | CAS Number  | Company, Catalog # | Solvent for intermediate dilution | Intermediate dilution | Solvent for final dilution | Final conc (stock) mM |
|-----|--------------------------------------|-------------|-------------|--------------------|-----------------------------------|-----------------------|----------------------------|-----------------------|
| 1   | 2-Aminobutyric acid                  | C02356      | 1492-24-6   | Sigma A1879        | water                             | 50mM                  | water                      | 1                     |
| 2   | 2-Ketoglutaric acid                  | C00026      | 328-50-7    | Sigma 61234        | water                             | 50mM                  | water                      | 1                     |
| 3   | 2-Morpholinoethanesulfonic acid      | ClS001      | 145224-94-8 | Sigma M8250        | water                             | 50mM                  | water                      | 1                     |
| 4   | 3-Hydroxy-D, L-Kynurenine            | C02794      | 2147-61-7   | Sigma 78047        | water                             | 50mM                  | water                      | 1                     |
| 5   | 4-Aminobutyric acid                  | C00334      | 56-12-2     | Sigma A2129        | water                             | 50mM                  | water                      | 1                     |
| 6   | 4-Hydroxyproline                     | C01157      | 51-35-4     | Sigma 30681        | water                             | 50mM                  | water                      | 1                     |
| 7   | 5-Glutamylcysteine                   | C00669      | 636-58-8    | Sigma G0903        | water                             | 50mM                  | water                      | 1                     |
| 8   | Acetylcarnitine                      | C02571      | 14992-62-2  | Sigma A1509        | water                             | 50mM                  | water                      | 1                     |
| 9   | Acetylcholine                        | C01996      | 51-84-3     | Sigma A6625        | water                             | 50mM                  | water                      | 1                     |
| 10  | Acetic acid                          | C00417      | 585-84-2    | Sigma A3412        | water                             | 50mM                  | water                      | 1                     |
| 11  | Adenine                              | C00147      | 73-24-5     | Wako 1-79          | 0.5 M HCl                         | 100mM                 | water                      | 1                     |
| 12  | Adenosine                            | C00212      | 58-61-7     | Wako 010-10491     | 1 M NH4OH                         | 100mM                 | water                      | 1                     |
| 13  | Adenosine 3',5'-cyclic monophosphate | C00575      | 60-92-4     | Sigma A6885        | water                             | 50mM                  | water                      | 1                     |
| 14  | Adenosine monophosphate              | C00020      | 61-19-8     | Sigma A1752        | water                             | 50mM                  | water                      | 1                     |
| 15  | Adenylylsuccinic acid                | C03794      | 19046-78-7  | Sigma A5028        | water                             | 50mM                  | water                      | 1                     |
| 16  | Alanine                              | C00041      | 56-41-7     | Sigma A7627        | water                             | 50mM                  | water                      | 1                     |
| 17  | Allantoin                            | C02348      | 97-59-6     | Sigma 05670        | water                             | 50mM                  | water                      | 1                     |
| 18  | Anthranilic Acid                     | C00108      | 118-92-3    | Sigma 10680        | water                             | 50mM                  | water                      | 1                     |
| 19  | Arginine                             | C00062      | 74-79-3     | Wako 017-04612     | water                             | 50mM                  | water                      | 1                     |
| 20  | Argininosuccinic acid                | C03406      | 2387-71-5   | Sigma A5707        | water                             | 50mM                  | water                      | 1                     |
| 21  | Asparagine                           | C00152      | 70-47-3     | Sigma A0884        | water                             | 50mM                  | water                      | 1                     |
| 22  | Aspartic acid                        | C00049      | 56-84-8     | Sigma A9256        | 0.5 M HCl                         | 100mM                 | water                      | 1                     |
| 23  | Asymmetric dimethylarginine          | C03626      | 102783-24-4 | Sigma D4268        | water                             | 50mM                  | water                      | 1                     |
| 24  | Carnitine                            | C00487      | 406-76-8    | Nakarai E1400      | water                             | 50mM                  | water                      | 1                     |
| 25  | Carnosine                            | C00386      | 305-84-0    | Sigma C9625        | water                             | 50mM                  | water                      | 1                     |
| 26  | Cholic acid                          | C00695      | 81-25-4     | Sigma C1254        | water                             | 50mM                  | water                      | 1                     |
| 27  | Choline                              | C00114      | 62-49-7     | Sigma C7017        | water                             | 50mM                  | water                      | 1                     |
| 28  | Citicoline                           | C00307      | 987-78-0    | Sigma 34015        | water                             | 50mM                  | water                      | 1                     |
| 29  | Citric acid                          | C00158      | 77-92-9     | Wako 035-03495     | water                             | 50mM                  | water                      | 1                     |
| 30  | Citrulline                           | C00327      | 372-75-8    | Sigma C7629        | water                             | 50mM                  | water                      | 1                     |
| 31  | Creatine                             | C00300      | 57-00-1     | Sigma C0780        | water                             | 50mM                  | water                      | 1                     |
| 32  | Creatinine                           | C00791      | 60-27-5     | Sigma C4255        | water                             | 50mM                  | water                      | 1                     |
| 33  | Cystathionine                        | C02291      | 56-88-2     | Sigma C7505        | water                             | 50mM                  | water                      | 1                     |
| 34  | Cysteamine                           | C01678      | 60-23-1     | Sigma M9768        | water                             | 50mM                  | water                      | 1                     |
| 35  | Cysteine                             | C00097      | 52-90-4     | Sigma 168149       | water                             | 50mM                  | water                      | 1                     |
| 36  | Cystine                              | C00491      | 56-89-3     | Wako #2706         | 1 M HCl                           | 100mM                 | water                      | 1                     |
| 37  | Cytidine                             | C00475      | 65-46-3     | Wako #035-23231    | water                             | 50mM                  | water                      | 1                     |
| 38  | Cytidine 3',5'-cyclic monophosphate  | C00941      | 3616-08-8   | Sigma C0985        | water                             | 50mM                  | water                      | 1                     |
| 39  | Cytidine monophosphate               | C00055      | 63-37-6     | Sigma C1006        | water                             | 50mM                  | water                      | 1                     |
| 40  | Cytosine                             | C00380      | 71-30-7     | Sigma C3506        | 0.1 M HCl                         | 100mM                 | water                      | 1                     |
| 41  | Dimethylglycine                      | C01026      | 1118-68-9   | Wako 350-30981     | water                             | 50mM                  | water                      | 1                     |
| 42  | Dopa                                 | C00355      | 59-92-7     | TRC D533751        | 0.5M HCl                          | 100mM                 | water                      | 1                     |
| 43  | Dopamine                             | C03758      | 51-61-6     | Sigma H8502        | water                             | 50mM                  | water                      | 1                     |
| 44  | Epinephrine                          | C00788      | 51-43-4     | Sigma E4250        | 0.5M HCl                          | 100mM                 | water                      | 1                     |
| 45  | FAD                                  | C00016      | 146-14-5    | Sigma F6625        | water                             | 50mM                  | water                      | 1                     |
| 46  | FMN                                  | C00061      | 146-17-8    | Sigma F2253        | water                             | 50mM                  | water                      | 1                     |
| 47  | Fumaric acid                         | C00122      | 110-17-8    | Wako 069-00652     | ethanol                           | 50mM                  | water                      | 1                     |
| 48  | Glutamic acid                        | C00025      | 56-86-0     | Sigma G1251        | 1 M HCl                           | 100mM                 | water                      | 1                     |
| 49  | Glutamine                            | C00064      | 56-85-9     | Sigma G3126        | water                             | 50mM                  | water                      | 1                     |
| 50  | Glutathione                          | C00051      | 70-18-8     | Wako 077-02011     | water                             | 50mM                  | water                      | 1                     |
| 51  | Glycine                              | C00037      | 56-40-6     | Wako 077-00735     | water                             | 50mM                  | water                      | 1                     |
| 52  | Guanine                              | C00242      | 73-40-5     | Wako 7-109         | 1M HCl                            | 100mM                 | water                      | 1                     |
| 53  | Guanosine                            | C00387      | 118-00-3    | Sigma G6752        | DMSO                              | 100mM                 | water                      | 1                     |
| 54  | Guanosine 3',5'-cyclic monophosphate | C00942      | 7665-99-8   | Sigma G6129        | water                             | 50mM                  | water                      | 1                     |
| 55  | Guanosine monophosphate              | C00144      | 85-32-5     | Sigma G8377        | water                             | 50mM                  | water                      | 1                     |
| 56  | Histamine                            | C00388      | 51-45-6     | Sigma H7125        | water                             | 50mM                  | water                      | 1                     |
| 57  | Histidine                            | C00135      | 71-00-1     | Wako 084-00682     | water                             | 50mM                  | water                      | 1                     |
| 58  | Homocysteine                         | C00155      | 6027-13-0   | Sigma 69453        | water                             | 50mM                  | water                      | 1                     |
| 59  | Homocystine                          | C01817      | 462-10-2    | Sigma H6010        | 0.5M HCl                          | 100mM                 | water                      | 1                     |
| 60  | Hypoxanthine                         | C00262      | 68-94-0     | Sigma H9377        | 1M HCl                            | 100mM                 | water                      | 1                     |
| 61  | Inosine                              | C00294      | 58-63-9     | Sigma I4125        | water                             | 50mM                  | water                      | 1                     |
| 62  | Isoctric acid                        | C00311      | 320-77-4    | Sigma I1252        | water                             | 50mM                  | water                      | 1                     |
| 63  | Isoleucine                           | C00407      | 73-32-5     | Kyowa 552          | water                             | 50mM                  | water                      | 1                     |
| 64  | Kynurenic Acid                       | C01717      | 492-27-3    | Sigma 67667        | 1 M NaOH                          | 100mM                 | water                      | 1                     |
| 65  | Kynurenine                           | C00328      | 2922-83-0   | Sigma K8625        | 0.5M HCl                          | 100mM                 | water                      | 1                     |
| 66  | L-Hydroorotic Acid                   | C00337      | 5988-19-2   | Sigma D7128        | DMSO                              | 100mM                 | water                      | 1                     |
| 67  | Lactic acid                          | C00186      | 79-33-4     | Sigma 252476       | water                             | 50mM                  | water                      | 1                     |
| 68  | Leucine                              | C00123      | 61-90-5     | Wako 124-00852     | water                             | 50mM                  | water                      | 1                     |
| 69  | Lysine                               | C00047      | 56-87-1     | Wako 121-01462     | water                             | 50mM                  | water                      | 1                     |
| 70  | Malic acid                           | C00149      | 97-67-6     | Sigma M0875        | water                             | 50mM                  | water                      | 1                     |
| 71  | Methionine                           | C00073      | 63-68-3     | Sigma M9625        | water                             | 50mM                  | water                      | 1                     |
| 72  | Methionine sulfone                   | ClS002      | 7314-32-1   | Sigma M0751        | water                             | 50mM                  | water                      | 1                     |
| 73  | Methionine sulfoxide                 | C02989      | 3226-65-1   | Sigma M1001        | water                             | 50mM                  | water                      | 1                     |
| 74  | NAD                                  | C00003      | 53-84-9     | Sigma N1511        | water                             | 50mM                  | water                      | 1                     |
| 75  | Niacinamide                          | C00153      | 98-92-0     | Sigma N5535        | water                             | 50mM                  | water                      | 1                     |
| 76  | Nicotinic acid                       | C00253      | 59-67-6     | TCI N082           | water                             | 50mM                  | water                      | 1                     |
| 77  | Norepinephrine                       | C00547      | 51-41-2     | Sigma 74480        | water                             | 50mM                  | water                      | 1                     |
| 78  | Ophthalmic acid                      | C21016      | 495-27-2    | Wako H-3145        | water                             | 50mM                  | water                      | 1                     |
| 79  | Ornithine                            | C00077      | 70-26-8     | Sigma O2375        | water                             | 50mM                  | water                      | 1                     |
| 80  | Orotic acid                          | C00295      | 65-86-1     | Sigma O2750        | water                             | 50mM                  | water                      | 1                     |
| 81  | Oxidized glutathione                 | C00127      | 27025-41-8  | Wako 079-03333     | water                             | 50mM                  | water                      | 1                     |
| 82  | Pantothenic acid                     | C00864      | 79-83-4     | Sigma 21210        | water                             | 50mM                  | water                      | 1                     |
| 83  | Phenylalanine                        | C00079      | 63-91-2     | Nakarai 26910      | water                             | 50mM                  | water                      | 1                     |
| 84  | Proline                              | C00148      | 147-85-3    | Nakarai 29001      | water                             | 50mM                  | water                      | 1                     |
| 85  | Putrescine                           | C00134      | 110-60-1    | Sigma 51799        | water                             | 50mM                  | water                      | 1                     |
| 86  | Pyruvic acid                         | C00022      | 127-17-3    | Sigma 107360       | water                             | 50mM                  | water                      | 1                     |
| 87  | S-Adenosylhomocysteine               | C00021      | 979-92-0    | Sigma A9384        | 1 M HCl                           | 100mM                 | water                      | 1                     |
| 88  | S-Adenosylmethionine                 | C00019      | 29908-03-0  | NEB B9003S         | water                             | 50mM                  | water                      | 1                     |
| 89  | Serine                               | C00065      | 56-45-1     | Wako 199-00402     | water                             | 50mM                  | water                      | 1                     |
| 90  | Serotonin                            | C00780      | 50-67-9     | Sigma H9523        | water                             | 50mM                  | water                      | 1                     |
| 91  | Spermidine                           | C00315      | 124-20-9    | Sigma 49761        | water                             | 50mM                  | water                      | 1                     |
| 92  | Spermine                             | C00750      | 71-44-3     | Sigma 55513        | water                             | 50mM                  | water                      | 1                     |
| 93  | Succinic acid                        | C00042      | 110-15-6    | Sigma S3674        | water                             | 50mM                  | water                      | 1                     |
| 94  | Symmetric dimethylarginine           | C03626      | 102783-24-4 | Sigma D0390        | water                             | 50mM                  | water                      | 1                     |
| 95  | Taurocholic acid                     | C05122      | 81-24-3     | Sigma 86339        | water                             | 50mM                  | water                      | 1                     |
| 96  | Threonine                            | C00188      | 72-19-5     | Wako 204-01322     | water                             | 50mM                  | water                      | 1                     |
| 97  | Thymidine                            | C00214      | 50-89-5     | Sigma T9250        | water                             | 50mM                  | water                      | 1                     |
| 98  | Thymidine monophosphate              | C00364      | 365-07-1    | Sigma T7004        | water                             | 50mM                  | water                      | 1                     |
| 99  | Thymine                              | C00178      | 65-71-4     | Wako 20-139        | water                             | 50mM                  | water                      | 1                     |
| 100 | Tryptophan                           | C00078      | 73-22-3     | Wako 204-03382     | 0.5M HCl                          | 100mM                 | water                      | 1                     |
| 101 | Tyrosine                             | C00082      | 60-18-4     | Sigma T3754        | 0.5M HCl                          | 100mM                 | water                      | 1                     |
| 102 | Uracil                               | C00106      | 66-22-8     | Wako 212-00062     | water                             | 50mM                  | water                      | 1                     |
| 103 | Uric acid                            | C00366      | 69-93-2     | Sigma U2825        | 1 M NaOH                          | 100mM                 | water                      | 1                     |
| 104 | Uridine                              | C00299      | 58-96-8     | Sigma U3750        | water                             | 50mM                  | water                      | 1                     |
| 105 | Valine                               | C00183      | 72-18-4     | Wako 226-00083     | water                             | 50mM                  | water                      | 1                     |
| 106 | Xanthine                             | C00385      | 69-89-6     | Sigma X0626        | 1 M NaOH                          | 100mM                 | water                      | 1                     |

**Table S3: Analysis of the Blank, related to “Systems performance check” section.**

| Compound Name                        | Blank                |       |
|--------------------------------------|----------------------|-------|
|                                      | Average 3 replicates | SD    |
| 2-Aminobutyric acid                  |                      |       |
| 2-Ketoglutaric acid                  |                      |       |
| 3-Hydroxy-D L-Kynurenine             |                      |       |
| 4-Aminobutyric acid                  |                      |       |
| 4-Hydroxyproline                     |                      |       |
| 5-Glutamylcysteine                   |                      |       |
| Acetylcamitine                       |                      |       |
| Acetylcholine                        |                      |       |
| Aconitic acid                        |                      |       |
| Adenine                              |                      |       |
| Adenosine 3',5'-cyclic monophosphate |                      |       |
| Adenosine monophosphate              |                      |       |
| Adenosine                            |                      |       |
| Adenylsuccinic acid                  |                      |       |
| Alanine                              |                      |       |
| Allantoin                            |                      |       |
| Anthranilic Acid                     |                      |       |
| Arginine                             |                      |       |
| Argininosuccinic acid                |                      |       |
| Asparagine                           |                      |       |
| Aspartic acid                        | 0.005                | 0.001 |
| Asymmetric dimethylarginine          |                      |       |
| Camitine                             |                      |       |
| Camosine                             |                      |       |
| Cholic Acid (CA)                     |                      |       |
| Choline                              | 0.528                | 0.042 |
| Citicoline                           |                      |       |
| Citric Acid                          |                      |       |
| Citrulline                           |                      |       |
| Creatine                             |                      |       |
| Creatinine                           |                      |       |
| Cystathionine                        |                      |       |
| Cysteamine                           |                      |       |
| Cysteine                             |                      |       |
| Cystine                              |                      |       |
| Cytidine 3',5'-cyclic monophosphate  |                      |       |
| Cytidine monophosphate               |                      |       |
| Cytidine                             |                      |       |
| Cytosine                             |                      |       |
| Dimethylglycine                      |                      |       |
| Dopa                                 |                      |       |
| Dopamine                             |                      |       |
| FAD                                  |                      |       |
| Epinephrine                          |                      |       |
| FMN                                  |                      |       |
| Fumaric Acid                         |                      |       |
| Glutamic acid                        |                      |       |
| Glutamine                            |                      |       |
| Glutathione oxidazed                 |                      |       |
| Glutathione reduced                  |                      |       |
| Glycine                              | 0.030                | 0.001 |
| Guanine                              |                      |       |
| Guanosine 3',5'-cyclic monophosphate |                      |       |
| Guanosine monophosphate              |                      |       |
| Guanosine                            | 0.007                | 0.001 |
| Histamine                            |                      |       |
| Histidine                            |                      |       |
| Homocysteine                         |                      |       |
| Homocystine                          |                      |       |
| Hypoxanthine                         |                      |       |
| Inosine                              |                      |       |
| Isocitric Acid                       |                      |       |
| Isoleucine                           |                      |       |
| Kynurenic Acid                       |                      |       |
| Kynurenine                           |                      |       |
| Lactic Acid                          | 0.028                | 0.001 |
| Leucine                              |                      |       |
| L-Hydrorootic Acid                   |                      |       |
| Lysine                               |                      |       |
| Malic Acid                           |                      |       |
| Methionine sulfone                   |                      |       |
| Methionine sulfoxide                 |                      |       |
| Methionine                           |                      |       |
| NAD                                  |                      |       |
| Niacinamide                          |                      |       |
| Nicotinic acid                       |                      |       |
| Norepinephrine                       |                      |       |
| Ophthalmic acid                      |                      |       |
| Omitine                              |                      |       |
| Orotic Acid Pos                      |                      |       |
| Pantothenic acid                     |                      |       |
| Phenylalanine                        |                      |       |
| Picolinic Acid                       |                      |       |
| Proline                              |                      |       |
| Putrescine                           | 5.165                | 0.720 |
| Pyruvic acid                         |                      |       |
| Ribitol                              |                      |       |
| S-Adenosylhomocysteine               |                      |       |
| S-Adenosylmethionine                 |                      |       |
| Sarcosine                            |                      |       |
| Serine                               |                      |       |
| Serotonin                            |                      |       |
| Spermidine                           |                      |       |
| Spermine                             |                      |       |
| Succinic acid                        | 0.007                | 0.001 |
| Symmetric dimethylarginine           |                      |       |
| Taurine                              |                      |       |
| Taurocholic acid                     |                      |       |
| Threonine                            | 0.003                | 0.001 |
| Thymidine monophosphate              |                      |       |
| Thymidine                            | 0.001                | 0.000 |
| Thymine                              |                      |       |
| Tryptophan                           |                      |       |
| Tyrosine                             |                      |       |
| Uracil                               |                      |       |
| Uric acid                            |                      |       |
| Uridine                              |                      |       |
| Valine                               |                      |       |
| Xanthine                             |                      |       |

Table S4: Analysis of the QC, related to "Systems performance check" section.

| Compound Name                        | QC-Rep1     |            | QC-Rep2    |            | QC-Rep3     |            | JPN mix    |            |
|--------------------------------------|-------------|------------|------------|------------|-------------|------------|------------|------------|
|                                      | Area        | Area/ISTD  | Area       | Area/ISTD  | Area        | Area/ISTD  | Average    | SD         |
| 2-Aminobutyric acid                  | 150340.029  | 0.16919431 | 155630.858 | 0.17795299 | 165246.948  | 0.17250208 | 0.17321646 | 0.00442283 |
| 2-Morpholinoethansulfonic Acid       | 888564.34   | 1          | 874561.63  | 1          | 957941.77   | 1          | 1          | 0          |
| 3-Hydroxy-D L-Kynurenine             | 416473.591  | 0.46870392 | 417581.344 | 0.47747504 | 412376.463  | 0.43048176 | 0.45888691 | 0.02498744 |
| 4-Aminobutyric acid                  | 290945.988  | 0.32743379 | 346787.777 | 0.39652755 | 333450.633  | 0.34809071 | 0.35735068 | 0.03546544 |
| 4-Hydroxyproline                     | 386549.664  | 0.43502721 | 390117.346 | 0.44607188 | 415673.948  | 0.43392402 | 0.43834104 | 0.00671779 |
| 5-Glutamylcysteine                   | 8954.70609  | 0.01007772 | 14267.529  | 0.01631392 | 10176.7792  | 0.01062359 | 0.01233841 | 0.00345369 |
| Acetylcamitine                       | 1865675.4   | 20.996516  | 19247991   | 22.0087303 | 18678316.3  | 19.4983838 | 20.8345434 | 1.26298703 |
| Acetylcholine                        | 2644.04421  | 0.00297564 | 2772.84077 | 0.00317055 | 2521.01403  | 0.0026317  | 0.00292596 | 0.00027284 |
| Aconitic acid                        | 127702.343  | 0.14371761 | 114446.063 | 0.13086106 | 101382.161  | 0.10583332 | 0.126804   | 0.01926524 |
| Adenine                              | 169639.899  | 0.19091459 | 159932.71  | 0.18287186 | 127565.805  | 0.13316655 | 0.16898433 | 0.03127869 |
| Adenosine 3',5'-cyclic monophosphate | 2254104.33  | 2.5367936  | 2200275.28 | 2.51586075 | 2313153.61  | 2.41471212 | 2.48912216 | 0.06528542 |
| Adenosine monophosphate              | 6803569.83  | 7.6568117  | 6835403.47 | 7.81580537 | 6127015.93  | 6.39602125 | 7.28954611 | 0.77788801 |
| Adenosine                            | 2126390.92  | 2.39306348 | 1777615.16 | 2.03257849 | 1227016.06  | 1.28088794 | 1.90217664 | 0.56743907 |
| Adenylsuccinic acid                  | 235184.445  | 0.26467914 | 239162.995 | 0.27346614 | 216950.06   | 0.22647521 | 0.2548735  | 0.02498299 |
| Alanine                              | 136497.252  | 0.1536155  | 130580.496 | 0.14930966 | 143848.243  | 0.15016387 | 0.15102967 | 0.00227975 |
| Allantoin                            | 5341.33572  | 0.0060112  | 4480.31589 | 0.00512293 | 5115.79968  | 0.00534041 | 0.00549151 | 0.00046301 |
| Anthrancilic Acid                    | 205415.207  | 0.23117651 | 201073.84  | 0.22991386 | 199648.595  | 0.20841412 | 0.22316817 | 0.01279296 |
| Arginine                             | 3477525.52  | 3.91364515 | 3058049.15 | 3.49666513 | 3417831.35  | 3.5678905  | 3.65940026 | 0.22304397 |
| Argininosuccinic acid                | 9525.24194  | 0.01071981 | 7946.9333  | 0.00908676 | 8287.18988  | 0.00865104 | 0.00948587 | 0.00190961 |
| Asparagine                           | 130133.35   | 0.14645349 | 127814.842 | 0.14614732 | 131507.375  | 0.13728118 | 0.143294   | 0.00520995 |
| Aspartic acid                        | 466240.11   | 0.52471171 | 456217.342 | 0.52165259 | 482132.388  | 0.50330031 | 0.51655487 | 0.01158025 |
| Asymmetric dimethylarginine          | 26048.2839  | 0.02931502 | 18187.5251 | 0.02079616 | 30234.3044  | 0.03156174 | 0.02722431 | 0.00567915 |
| Camitine                             | 3723680.26  | 4.19067038 | 3623170.11 | 4.14284139 | 2212212.39  | 2.3093391  | 3.54761696 | 1.0726467  |
| Camosine                             | 1619076     | 1.82212579 | 1813476.96 | 2.07358396 | 2047728.07  | 2.13763313 | 2.01111429 | 0.1667725  |
| Cholic Acid (CA)                     | 5344.18265  | 0.0060144  | 5577.32153 | 0.00637728 | 5623.23949  | 0.00587013 | 0.00608727 | 0.00026131 |
| Choline                              | 5480851.85  | 6.16821046 | 5125977.72 | 5.86119669 | 5808354.79  | 6.06336936 | 6.0309225  | 0.15605709 |
| Citicoline                           | 223969.934  | 0.25205821 | 212339.09  | 0.24279488 | 204189.982  | 0.25073547 | 0.24852952 | 0.00501018 |
| Citric Acid                          | 84716.8141  | 0.09534123 | 89355.3969 | 0.10217164 | 45322.1275  | 0.04731199 | 0.08160828 | 0.02989717 |
| Citrulline                           | 786071.243  | 0.88465315 | 805305.42  | 0.92081037 | 872197.388  | 0.91049103 | 0.90531818 | 0.01862538 |
| Creatine                             | 497877.619  | 0.5603169  | 797832.122 | 0.91226518 | 510463.937  | 0.53287575 | 0.66848594 | 0.21156439 |
| Creatinine                           | 6328316.51  | 7.12195643 | 6204505.54 | 7.09441776 | 5722006.21  | 5.97322966 | 6.72986795 | 0.65541263 |
| Cystathionine                        | 2529778.15  | 2.84703993 | 2426578.62 | 2.77462278 | 2568831.19  | 2.68107234 | 2.76757835 | 0.08320774 |
| Cysteamine                           | 9653.08681  | 0.01086369 | 24354.7284 | 0.02784793 | 31715.7481  | 0.03310822 | 0.02393995 | 0.01162579 |
| Cysteine                             | 9788.77045  | 0.01101639 | 9718.95817 | 0.01111295 | 9794.36827  | 0.01022439 | 0.01078458 | 0.00048753 |
| Cystine                              | 1657385.56  | 1.86523978 | 1596413.31 | 1.82538686 | 1707403.05  | 1.78236621 | 1.82433095 | 0.04144687 |
| Cytidine 3',5'-cyclic monophosphate  | 3570274.22  | 4.01802555 | 3487305.17 | 3.98748933 | 3564752.35  | 3.72126204 | 3.90892564 | 0.16323705 |
| Cytidine monophosphate               | 2879414.7   | 3.24052471 | 2746095.3  | 3.13996774 | 2951324.48  | 3.08090174 | 3.15379807 | 0.08070521 |
| Cytidine                             | 3648625.01  | 4.10620238 | 2920977.38 | 3.33993315 | 2395367.79  | 2.5005359  | 3.31555715 | 0.80311074 |
| Cytosine                             | 1667056.88  | 1.87612399 | 982174.861 | 1.1230482  | 780683.491  | 0.81495923 | 1.27137714 | 0.54591095 |
| Dimethylglycine                      | 227018.483  | 0.25548908 | 202032.912 | 0.23101049 | 211832.21   | 0.22113266 | 0.23587741 | 0.01768774 |
| Dopa                                 | 21711790.14 | 2.44415631 | 2267160.98 | 2.59233987 | 20414053.39 | 2.52004189 | 2.51884602 | 0.07409902 |
| Dopamine                             | 2028666.47  | 2.28308337 | 1999720.69 | 2.28654063 | 2008794.41  | 2.09699009 | 2.2222047  | 0.10845281 |
| Epinephrine                          | 2761353.88  | 3.10765777 | 2537523.39 | 2.90148037 | 2398780.98  | 2.50409895 | 2.8377457  | 0.30678559 |
| FMN                                  | 127850.907  | 0.1438848  | 121755.087 | 0.13921842 | 128105.83   | 0.13373029 | 0.1389445  | 0.0050828  |
| Fumaric Acid                         | 10785.0253  | 0.01213759 | 10197.182  | 0.01165976 | 10620.4376  | 0.01108673 | 0.01162802 | 0.00052615 |
| Glutamic acid                        | 788716.9231 | 0.88763063 | 763948.943 | 0.87352214 | 730590.827  | 0.76266726 | 0.84127334 | 0.06843938 |
| Glutamine                            | 92822.8343  | 0.10446383 | 91221.9304 | 0.10430589 | 91517.7116  | 0.09553578 | 0.10143517 | 0.00510963 |
| Glutathione oxidized                 | 196710.996  | 0.22137969 | 209285.256 | 0.23930304 | 217460.442  | 0.227008   | 0.22923024 | 0.00916599 |
| Glutathione reduced                  | 35525.1677  | 0.03998041 | 36774.6313 | 0.04204922 | 37099.8547  | 0.03872872 | 0.04025278 | 0.00167692 |
| Glycine                              | 70749.431   | 0.07962218 | 72908.0684 | 0.08336527 | 76314.4721  | 0.07966504 | 0.08088417 | 0.00214881 |
| Guanine                              | 15135.5472  | 0.01703371 | 15595.5424 | 0.01783241 | 25831.0418  | 0.02696515 | 0.02601042 | 0.00551782 |
| Guanosine 3',5'-cyclic monophosphate | 824264.517  | 0.92763628 | 808948.275 | 0.92497572 | 875439.217  | 0.91387519 | 0.9221624  | 0.00729918 |
| Guanosine monophosphate              | 530166.592  | 0.59665527 | 509905.951 | 0.58304176 | 582464.686  | 0.60803767 | 0.59591157 | 0.01251454 |
| Guanosine                            | 4702905.84  | 5.29270153 | 4643539.68 | 5.30956257 | 4387051.91  | 4.57966448 | 5.06064286 | 0.4166248  |
| Histamine                            | 1146555.32  | 1.29034586 | 1107472.34 | 1.2663171  | 1333470.13  | 1.39201585 | 1.31622627 | 0.06672624 |
| Histidine                            | 388288.09   | 0.43698461 | 359364.192 | 0.41090797 | 3983922.78  | 4.15883605 | 4.21258621 | 0.13844356 |
| Homocysteine                         | 7469.90802  | 0.00840672 | 40691.187  | 0.04652752 | 50879.7822  | 0.05311363 | 0.03601596 | 0.02413601 |
| Homocystine                          | 1031407.92  | 1.16075773 | 1047319.53 | 1.19753657 | 1182092.47  | 1.23399198 | 1.19742876 | 0.03661725 |
| Hypoxanthine                         | 93501.225   | 1.05227296 | 932483.579 | 1.0662297  | 672343.977  | 0.7018631  | 0.94012192 | 0.20645616 |
| Inosine                              | 3190015.6   | 3.59007835 | 3134200.29 | 3.58373863 | 3218241.88  | 3.3595381  | 3.51111836 | 0.13131062 |
| Isoelectric Acid                     | 30756.396   | 0.03461358 | 28843.4283 | 0.03298044 | 31705.6314  | 0.03309766 | 0.0335639  | 0.00091094 |
| Isoleucine                           | 3252523.32  | 3.66042523 | 3210505.57 | 3.67098838 | 3321394.11  | 3.46721921 | 3.59954427 | 0.11471851 |
| Kynurenic acid                       | 981.49551   | 0.00110459 | 954.823483 | 0.00109177 | 1043.83789  | 0.00108967 | 0.00109534 | 8.074E-06  |
| Kynurenine                           | 254155.745  | 0.28602965 | 287685.247 | 0.32894794 | 287601.991  | 0.30022909 | 0.30506889 | 0.02186465 |
| Lactic Acid                          | 7125.83872  | 0.00812078 | 7142.75554 | 0.00816724 | 9426.28561  | 0.00984014 | 0.00870939 | 0.00097954 |
| Leucine                              | 3503174.41  | 3.94251069 | 3483839.84 | 3.98352698 | 3541492.02  | 3.69698047 | 3.87433938 | 0.15496039 |
| L-Hydroxotrotic Acid                 | 14260.6538  | 0.0160491  | 11693.664  | 0.01337089 | 17437.688   | 0.01820329 | 0.01587442 | 0.00242093 |
| Lysine                               | 1391136.3   | 1.56559997 | 1328997.15 | 1.51961521 | 1431696.98  | 1.49455533 | 1.52659017 | 0.03603224 |
| Malic Acid                           | 21905.3682  | 0.02465254 | 20161.3466 | 0.02035309 | 23362.9964  | 0.02438874 | 0.02403146 | 0.0008575  |
| Methionine sulfone                   | 27476.0028  | 0.03092179 | 23821.5084 | 0.02723823 | 27545.0639  | 0.02875442 | 0.02897148 | 0.00185135 |
| Methionine sulfoxide                 | 872830.288  | 0.98229273 | 1011319.41 | 1.15637295 | 913925.584  | 0.95405129 | 1.03090566 | 0.10957156 |
| Methionine                           | 1933.69246  | 0.0021762  | 1970.45671 | 0.00225308 | 1600.85035  | 0.00167114 | 0.00203347 | 0.00031614 |
| NAD                                  | 180343.467  | 0.20296051 | 182066.549 | 0.20818035 | 214297.521  | 0.22370621 | 0.21161569 | 0.01079107 |
| Niacinamide                          | 3982546.98  | 4.48200181 | 3802939.28 | 4.34839486 | 3242401.02  | 3.38475794 | 4.0717182  | 0.59866393 |
| Nicotinic acid                       | 3243391.61  | 3.65014829 | 2690695.41 | 3.07662185 | 1852339.93  | 1.93366652 | 2.88681222 | 0.87384106 |
| Ophthalmic acid                      | 111529.39   | 1.25512498 | 1087767.19 | 1.24378563 | 1055161.2   | 1.10148783 | 1.20013281 | 0.085617   |
| Omitine                              | 789905.241  | 0.88896797 | 733731.754 | 0.8389709  | 800376.96   | 0.83551734 | 0.8544854  | 0.02991266 |
| Orotic Acid Pos                      | 255291.26   | 0.28730757 | 251150.054 | 0.28717251 | 263181.494  | 0.27473642 | 0.28307217 | 0.00721928 |
| Pantothenic acid                     | 775981.114  | 0.87329761 | 736596.739 | 0.84224681 | 708352.216  | 0.73945227 | 0.81833223 | 0.07005408 |
| Phenylalanine                        | 3230492.54  | 3.63563154 | 3211604.05 | 3.67224441 | 3195445.22  | 3.33574056 | 3.54787217 | 0.18462121 |
| Picolinic Acid                       | 3148631.04  | 3.54350371 | 3480483.47 | 3.9796892  | 3111352.48  | 3.24795574 | 3.59038289 | 0.36811236 |
| Proline                              | 2784649.57  | 3.133875   | 2770823.57 | 3.16824279 | 3052168.9   | 3.18617372 | 3.16276384 | 0.02657637 |
| Putrescine                           | 93827.9191  | 0.1059496  | 97215.856  | 0.11115953 | 114786.131  | 0.11982579 | 0.11219343 | 0.00717153 |
| S-Adenosylhomocysteine               | 516187.999  | 0.5809236  | 482545.766 | 0.5517573  | 384956.161  | 0.40185758 | 0.51151283 | 0.09607744 |
| S-Adenosylmethionine                 | 1108476.5   | 1.24749154 | 1257892.19 | 1.43831167 | 196306      |            |            |            |



**Table S6: Absolute quantification, related to “Basic data analysis” section.**

| Uncorrected                    | HT29 Ctrl 1 | HT29 Ctrl 2 | HT29 Ctrl 3 | HT29 Ctrl 4 | HT29 Ctrl 5 | Met 10mM 1 | Met 10mM 2 | Met 10mM 3 | Met 10mM 4 | Met 10mM 5 | Met 10mM 6  |
|--------------------------------|-------------|-------------|-------------|-------------|-------------|------------|------------|------------|------------|------------|-------------|
| Compound Name                  | Area        | Area        | Area        | Area        | Area        | Area       | Area       | Area       | Area       | Area       | Area        |
| 2-Morpholinoethansulfonic Acid | 295073.12   | 248132.62   | 209232.36   | 302957.98   | 211807.71   | 466792.9   | 452862.37  | 400524.53  | 458171.03  | 443308.52  | 521175.5835 |
| 4-Aminobutyric acid            | 860262.423  | 933547.79   | 841638.645  | 952086.577  | 959341.184  | 62467.5009 | 55582.099  | 48883.0699 | 59977.223  | 59245.9859 | 54019.88729 |
| Glutamine                      | 51937.7803  | 46106.4544  | 44745.9871  | 45507.01    | 43488.9601  | 102278.494 | 46516.7256 | 65590.3006 | 79145.6457 | 75659.4364 | 41280.31657 |
| Tryptophan                     | 554144.172  | 570531.451  | 501869.129  | 608669.808  | 644947.587  | 467055.267 | 577361.316 | 502435.63  | 462233.088 | 439092.52  | 604016.4963 |

| Corrected           | HT29 Ctrl |            | HT29 Met  |            |
|---------------------|-----------|------------|-----------|------------|
| Compound Name       | Average   | SD         | Average   | SD         |
| 4-Aminobutyric acid | 714465.72 | 127130.991 | 31128.257 | 2664.72553 |
| Glutamine           | 12593.238 | 1585.39664 | 12473.522 | 3878.97126 |
| Tryptophan          | 103702.47 | 19956.8624 | 60531.983 | 6952.36786 |

| Correction | 1 | 1.18917506 | 1.41026521 | 0.97397377 | 1.39311793 | 0.63212856 | 0.65157351 | 0.73671674 | 0.64402397 | 0.66561573 | 0.566168358 |
|------------|---|------------|------------|------------|------------|------------|------------|------------|------------|------------|-------------|
|------------|---|------------|------------|------------|------------|------------|------------|------------|------------|------------|-------------|

| Corrected                      | HT29 Ctrl 1 | HT29 Ctrl 2 | HT29 Ctrl 3 | HT29 Ctrl 4 | HT29 Ctrl 5 | Met 10mM 1 | Met 10mM 2 | Met 10mM 3 | Met 10mM 4 | Met 10mM 5 | Met 10mM 6  |
|--------------------------------|-------------|-------------|-------------|-------------|-------------|------------|------------|------------|------------|------------|-------------|
| Compound Name                  | Area        | Area        | Area        | Area        | Area        | Area       | Area       | Area       | Area       | Area       | Area        |
| 2-Morpholinoethansulfonic Acid | 295073.12   | 295073.12   | 295073.12   | 295073.12   | 295073.12   | 295073.12  | 295073.12  | 295073.12  | 295073.12  | 295073.12  | 295073.1241 |
| 4-Aminobutyric acid            | 860262.42   | 1110151.7   | 1186933.7   | 927307.35   | 1336475.4   | 39487.491  | 36215.823  | 36012.976  | 38626.769  | 39435.06   | 30584.35086 |
| Glutamine                      | 51937.78    | 54828.646   | 63103.709   | 44322.634   | 60585.25    | 64653.157  | 30309.066  | 48321.472  | 50971.693  | 50360.111  | 23371.60903 |
| Tryptophan                     | 554144.17   | 678461.77   | 707768.57   | 592828.43   | 898488.05   | 295238.97  | 376193.34  | 370152.74  | 297689.19  | 292266.89  | 341975.0276 |

| Corrected           | HT29 Ctrl 1 | HT29 Ctrl 2 | HT29 Ctrl 3 | HT29 Ctrl 4 | HT29 Ctrl 5 | Met 10mM 1 | Met 10mM 2 | Met 10mM 3 | Met 10mM 4 | Met 10mM 5 | Met 10mM 6  |
|---------------------|-------------|-------------|-------------|-------------|-------------|------------|------------|------------|------------|------------|-------------|
| Compound Name       | Conc. (nM)  | Conc. (nM) | Conc. (nM) | Conc. (nM) | Conc. (nM) | Conc. (nM) | Conc. (nM)  |
| 4-Aminobutyric acid | 567253.44   | 731506.74   | 781975.84   | 611322.35   | 880270.22   | 33305.574  | 30724.996  | 30564.998  | 32626.666  | 33264.218  | 26283.08809 |
| Glutamine           | 11948.496   | 12566.114   | 14334.038   | 10321.56    | 13795.983   | 17598.084  | 8793.1613  | 13411.069  | 14090.516  | 13933.722  | 7014.579574 |
| Tryptophan          | 84004.173   | 102528.8    | 106895.82   | 89768.532   | 135315.01   | 54509.507  | 68985.164  | 67905.029  | 54947.636  | 53978.061  | 62866.50067 |

|                     | M          | B          | Dilution Factor |
|---------------------|------------|------------|-----------------|
| 4-Aminobutyric acid | 78.068282  | 2737.47175 | HT29Ctrl<br>50  |
| Glutamine           | 234.033343 | 3989.14942 | HT29Met<br>60   |
| Tryptophan          | 335.546902 | 9602.63134 |                 |

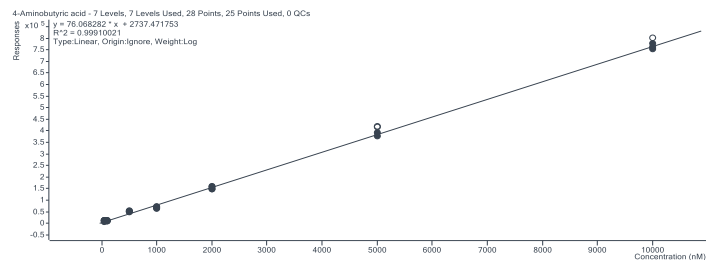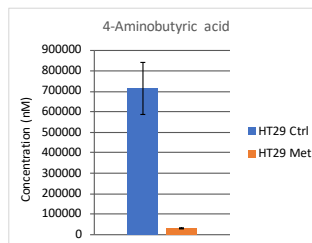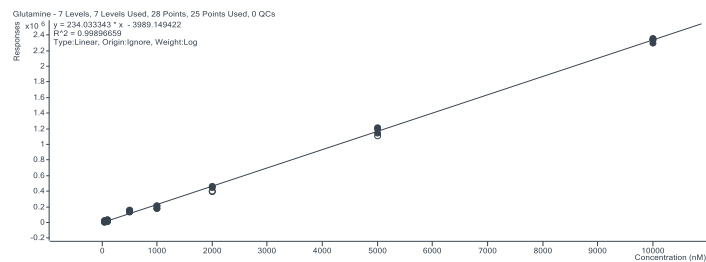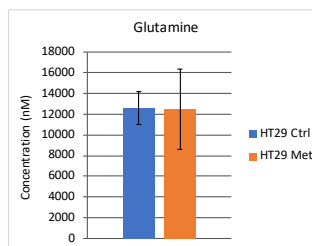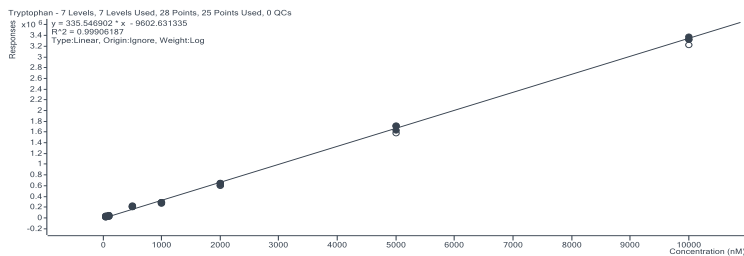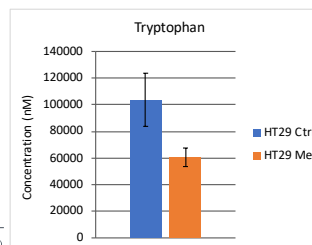

Supplement: mmc1.pdf [file mmc1.pdf]
